# Supplementary material for: Dipyridylketone as a versatile ligand precursor for new cationic heteroleptic cyclometalated iridium complexes
Source: Royal Society of Chemistry journal article supplement (doi:10.1039/c1dt11279a), 2011-11-18
Supplement: c1dt11279a.pdf [file c1dt11279a.pdf]

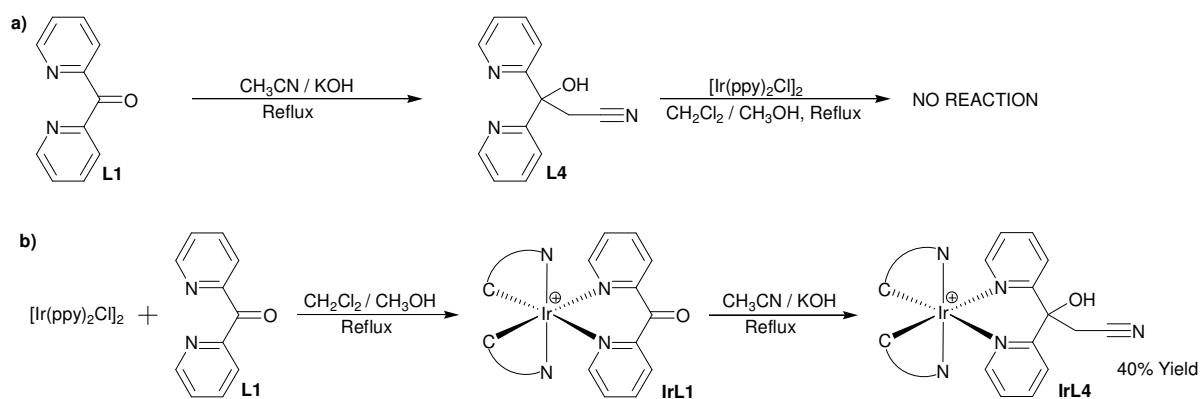

**Scheme ESI1** Sketch of the synthetic pathways to **IrL4**

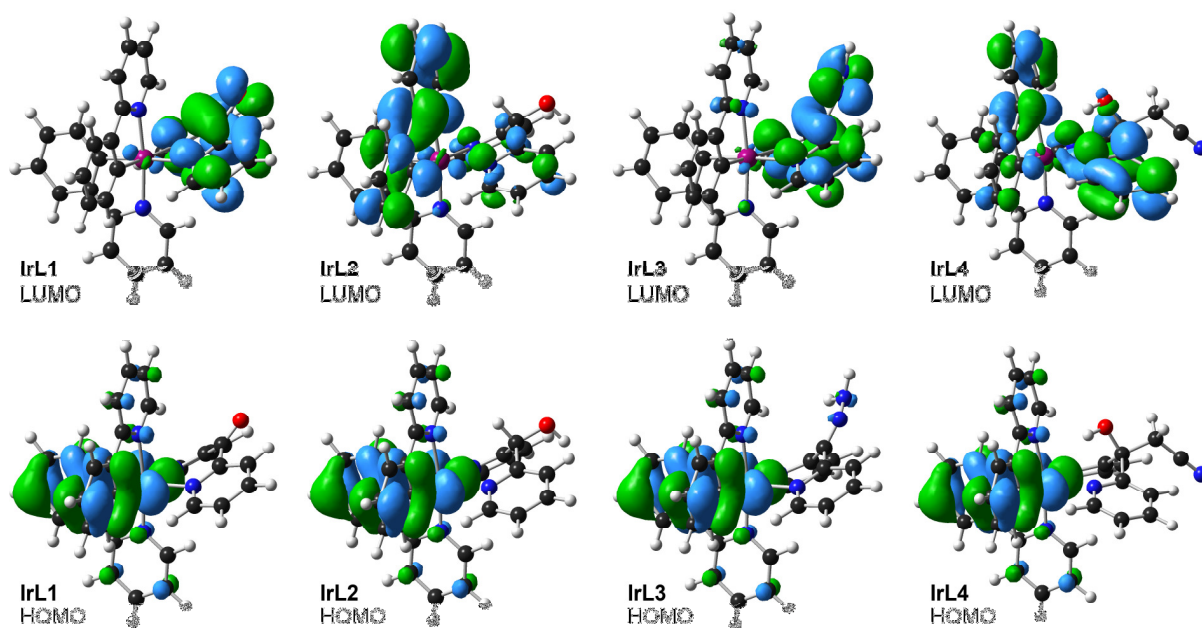

**Fig. ESI1** Frontier orbitals for complexes **IrL1–IrL4**

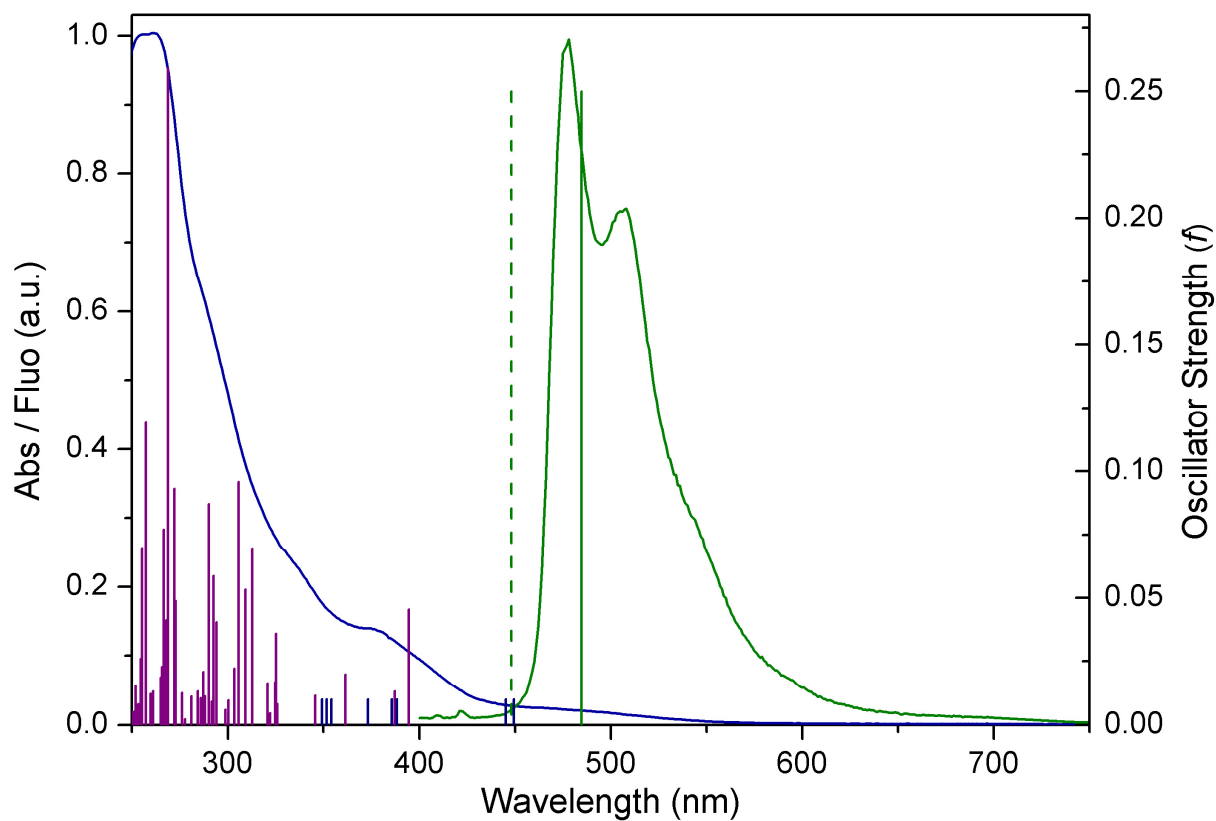

**Fig. ESI2** Experimental absorption (blue line) and emission (green line) spectra, calculated singlet (purple bars) and triplet (blue bars) excited state transitions, and estimated emission energy using  $\Delta$ SCF (dashed green bar) and TD-DFT (solid green bar) approaches, of complex **IrL2** in acetonitrile. The vertical bar height of singlet transitions is equal to the oscillator strength, while the other bars have arbitrary intensity to indicate their position

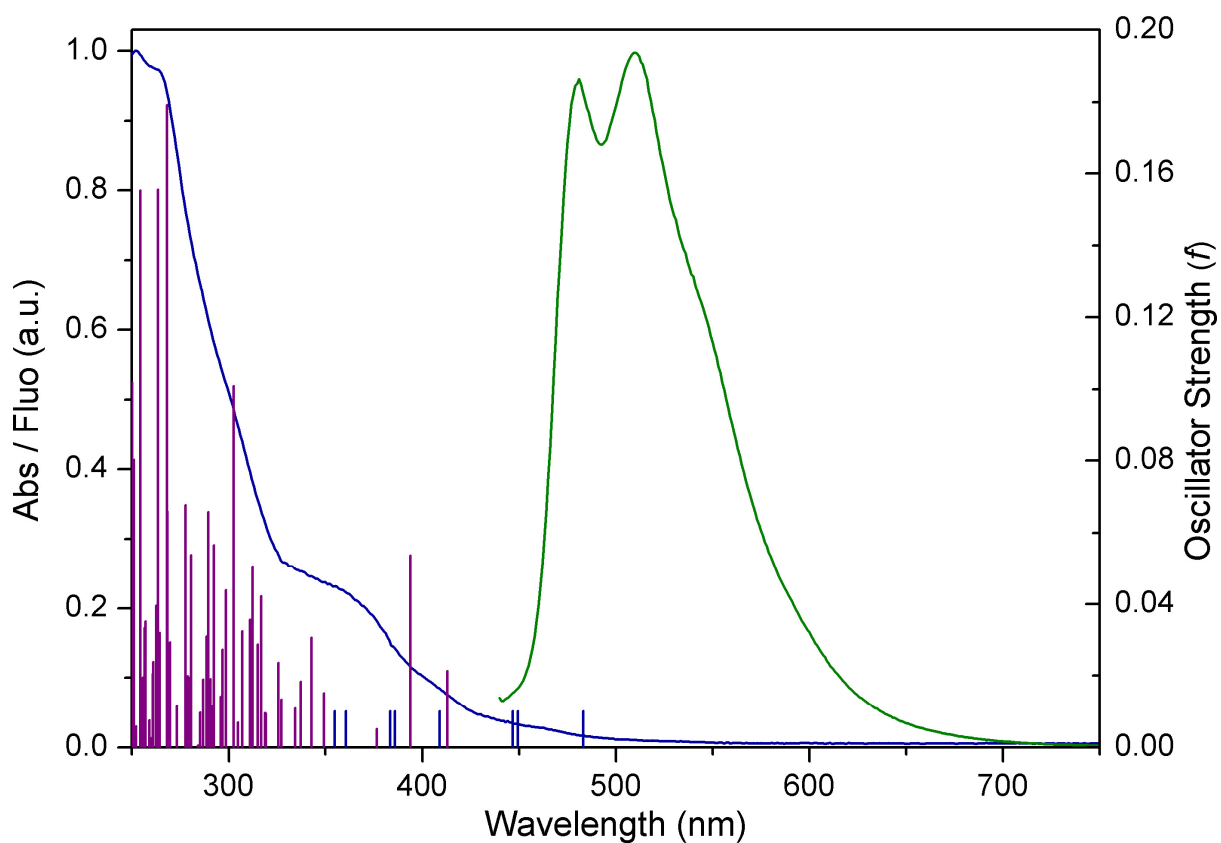

**Fig. ESI3** Experimental absorption (blue line) and emission (green line) spectra, calculated singlet (purple bars) and triplet (blue bars) excited state transitions of complex **IrL3** in acetonitrile. The vertical bar height of singlet transitions is equal to the oscillator strength, while the other bars have arbitrary intensity to indicate their position

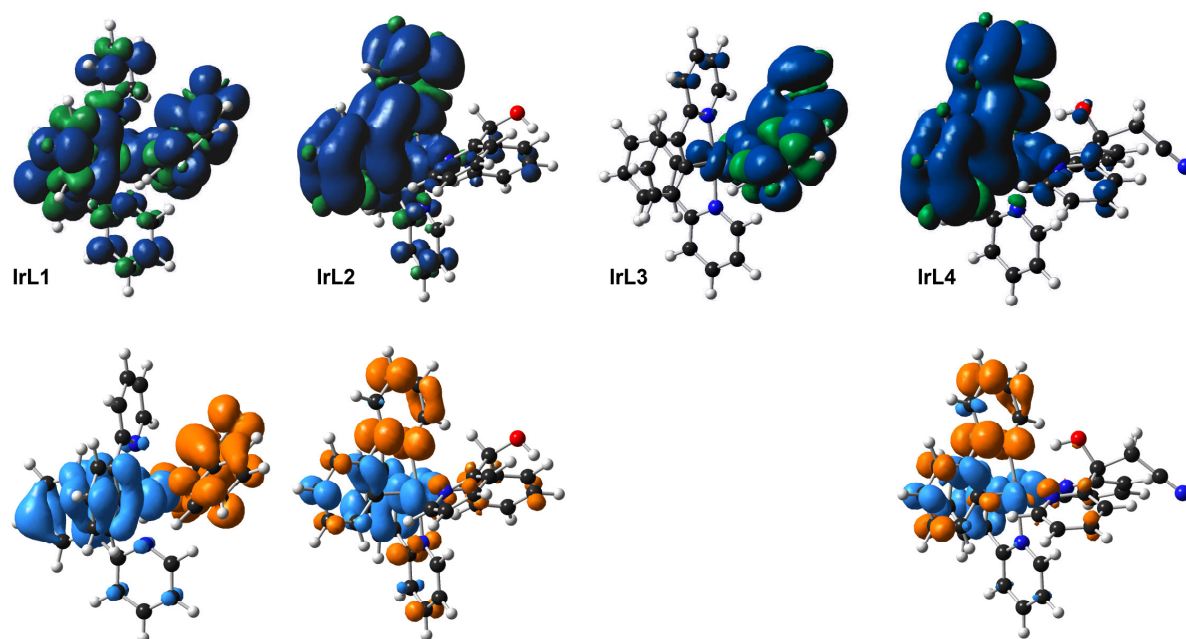

**Fig. ESI4** Top: contour plots of the spin density of the lowest-lying triplet-state geometry of **IrL1–IrL4** (isovalue=0.004), bottom: electron density difference maps (EDDMs) of the lowest energy singlet-triplet electronic transition of **IrL1**, **IrL2**, and **IrL4** in their lowest-lying triplet state geometries. Blue indicates a decrease in charge density, while orange indicates an increase
